# Supplementary material
Source: Royal Society of Chemistry journal article supplement (doi:10.1039/d6dt00331a)
Supplement: d6dt00331a1.pdf [file d6dt00331a1.pdf]

## Supporting Information

### **Catalytic CO<sub>2</sub> fixation to cyclic carbonates by copper(II) complexes of N<sub>4</sub> ligands under mild conditions**

Sethuraman Muthuramalingam,<sup>a,b†</sup> Winaki P Sohtun,<sup>c,†</sup> Prince Christofer F,<sup>a</sup> Marappan Velusamy,<sup>c\*</sup> and Ramasamy Mayilmurugan,<sup>a,\*</sup>

<sup>a</sup>Department of Chemistry, Indian Institute of Technology Bhilai, Raipur – 492015 Chattisgarh, India. E-mail: ([murugan@iitbhilai.ac.in](mailto:murugan@iitbhilai.ac.in))

<sup>b</sup>Institut de Química Computacional i Catalisi (IQCC) and Departament de Química, Universitat de Girona, Girona E-17003 Catalonia, Spain.

<sup>c</sup>Department of Chemistry, North Eastern Hill University, Shillong-793022  
(E-mail: [mvelusamy@gmail.com](mailto:mvelusamy@gmail.com))

<sup>†</sup>Both authors contributed equally to this manuscript

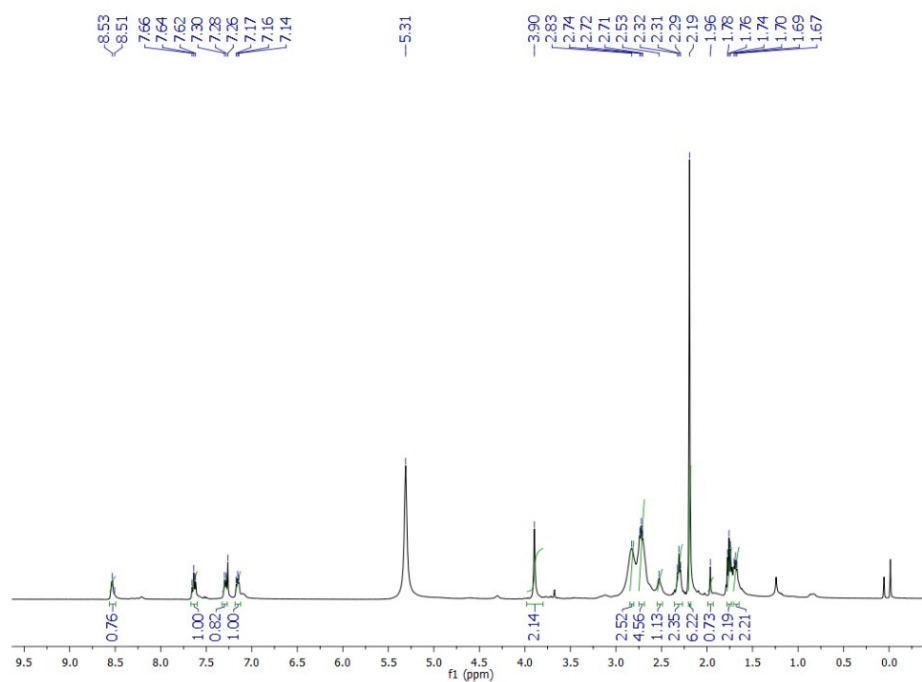

Figure S1.  $^1\text{H}$  NMR Spectrum for the Ligand **1** in  $\text{CDCl}_3$ .

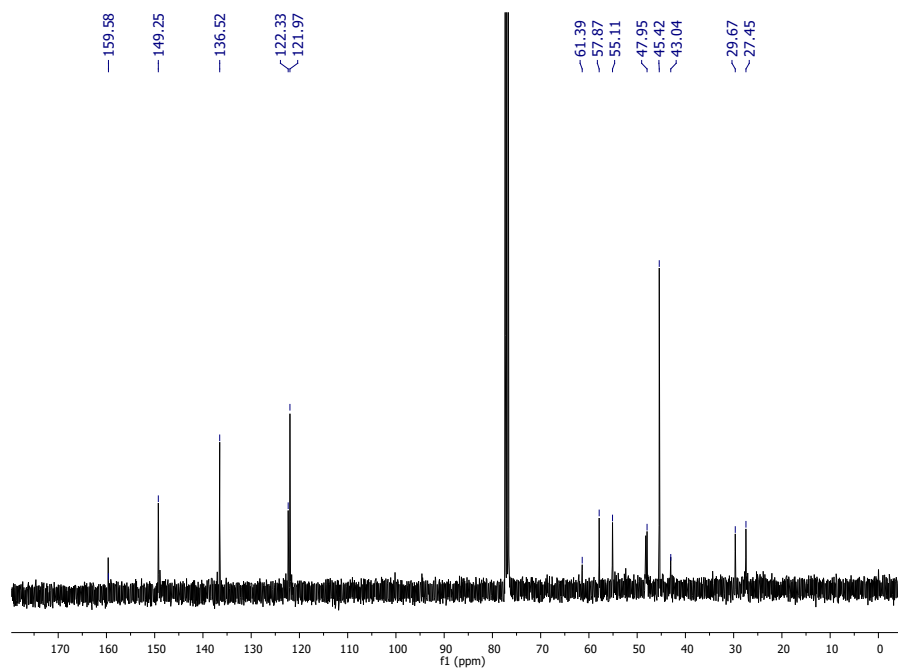

Figure S2.  $^{13}\text{C}$  NMR Spectrum for the Ligand **1** in  $\text{CDCl}_3$ .

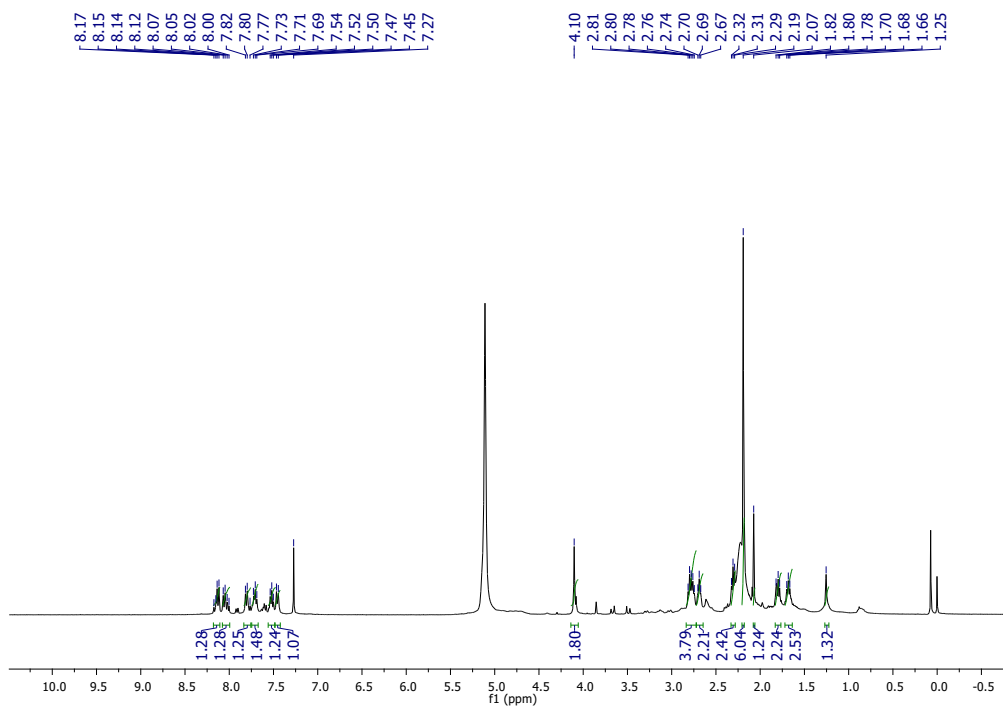

Figure S3.  $^1\text{H}$  NMR Spectrum for the Ligand **2** in  $\text{CDCl}_3$ .

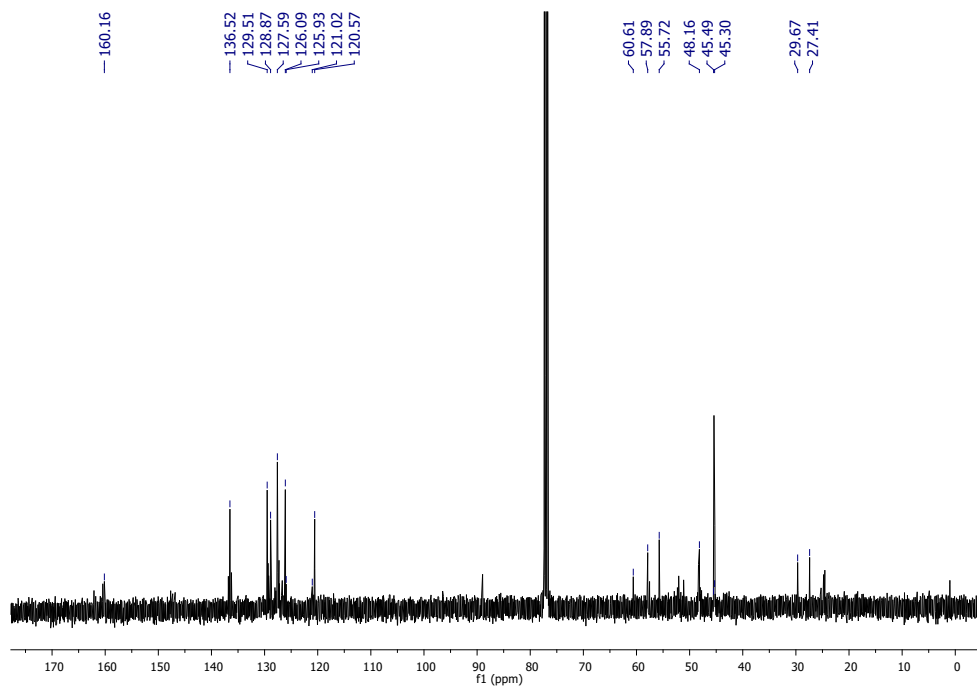

Figure S4.  $^{13}\text{C}$  NMR Spectrum for the Ligand **2** in  $\text{CDCl}_3$ .

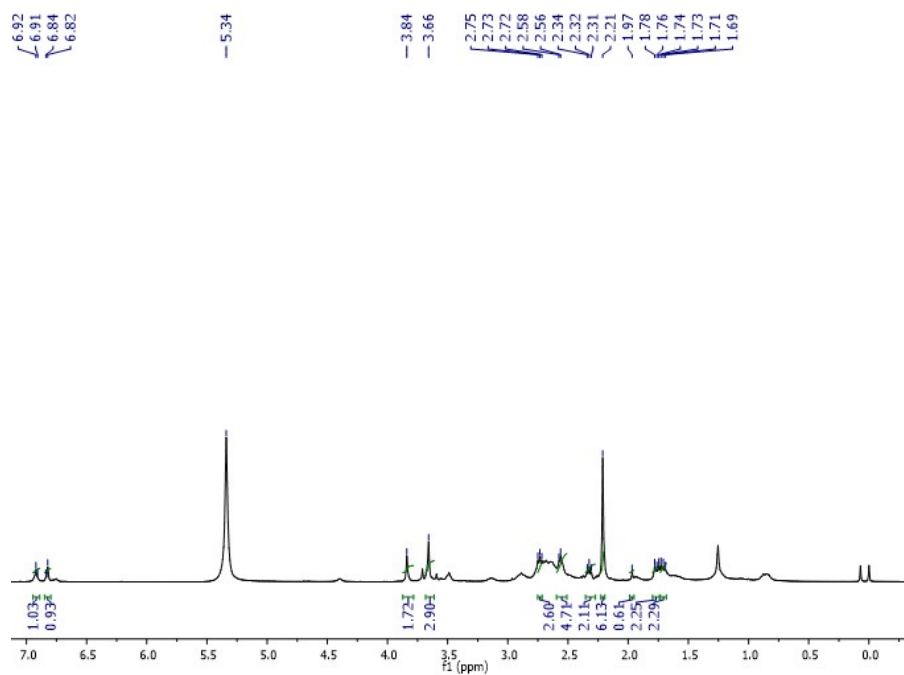

Figure S5.  $^1\text{H}$  NMR Spectrum for the Ligand **3** in  $\text{CDCl}_3$ .

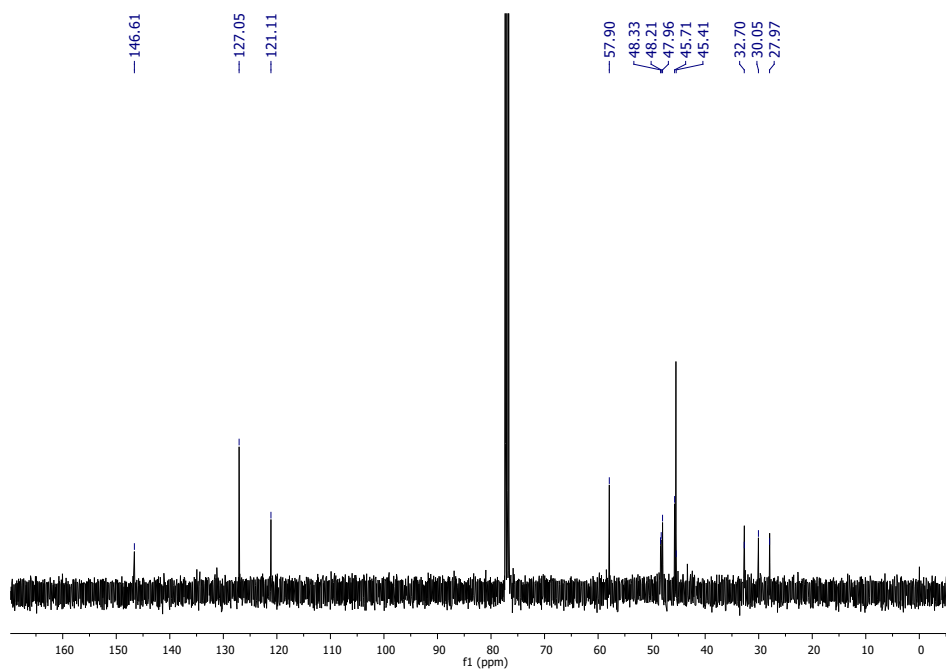

Figure S6.  $^{13}\text{C}$  NMR Spectrum for the Ligand **3** in  $\text{CDCl}_3$ .

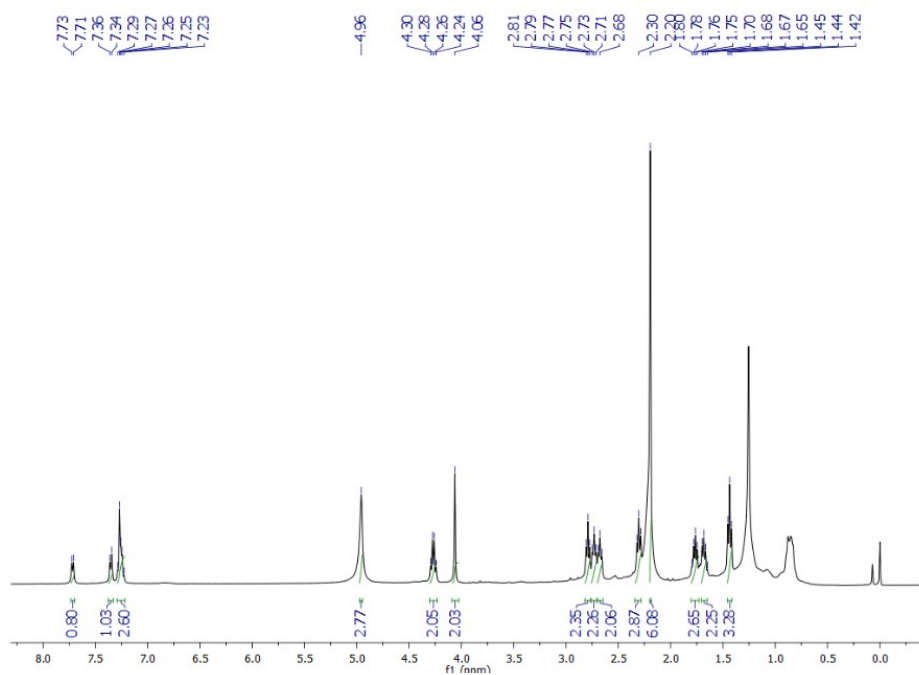

**Figure S7.**  $^1\text{H}$  NMR Spectrum for the Ligand **4** in  $\text{CDCl}_3$ .

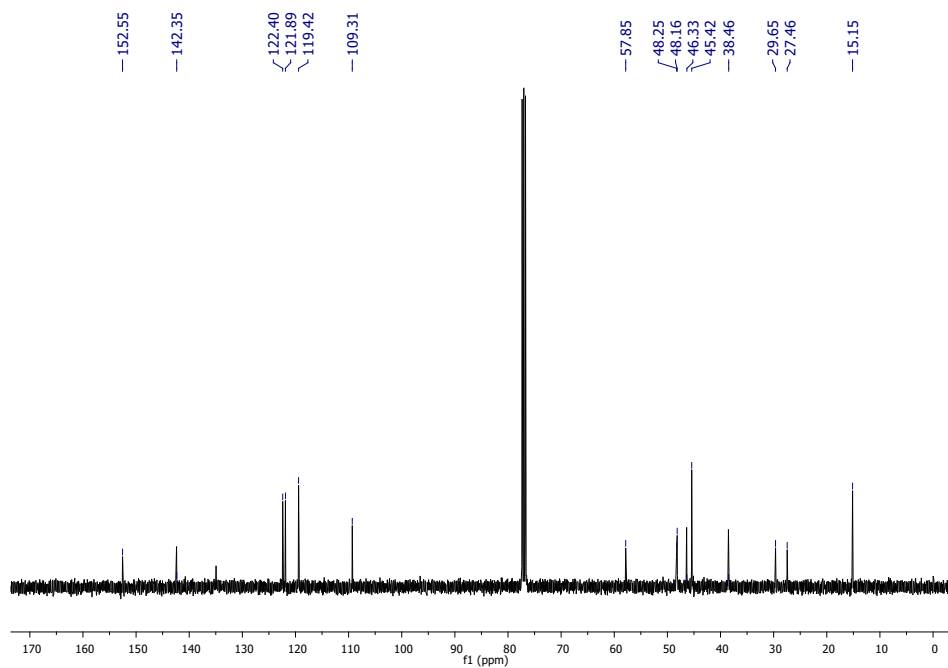

**Figure S8.**  $^{13}\text{C}$  NMR Spectrum for the Ligand **4** in  $\text{CDCl}_3$ .

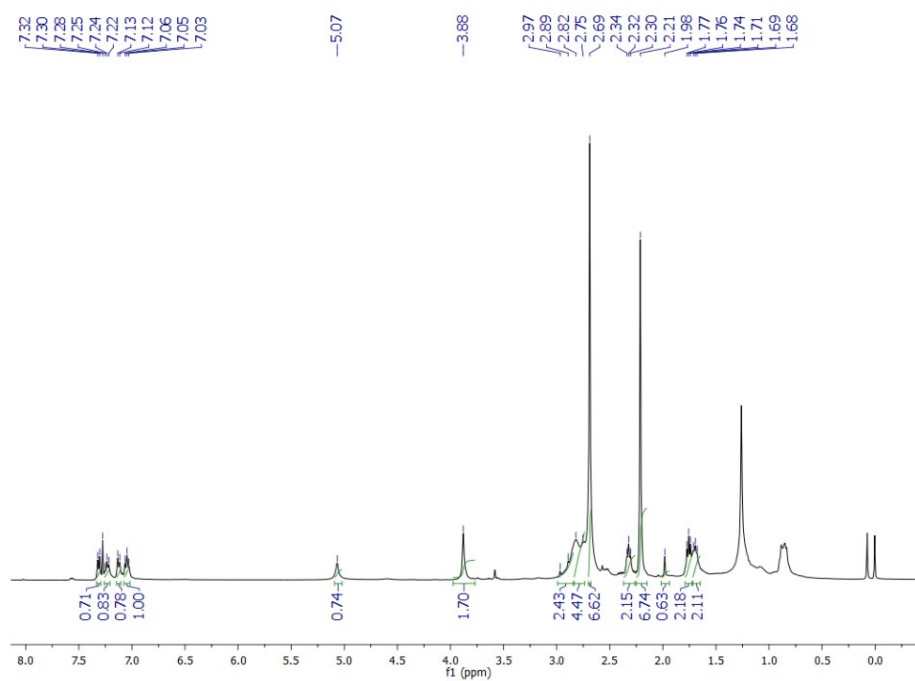

**Figure S9.**  $^1\text{H}$  NMR Spectrum for the Ligand **5** in  $\text{CDCl}_3$ .

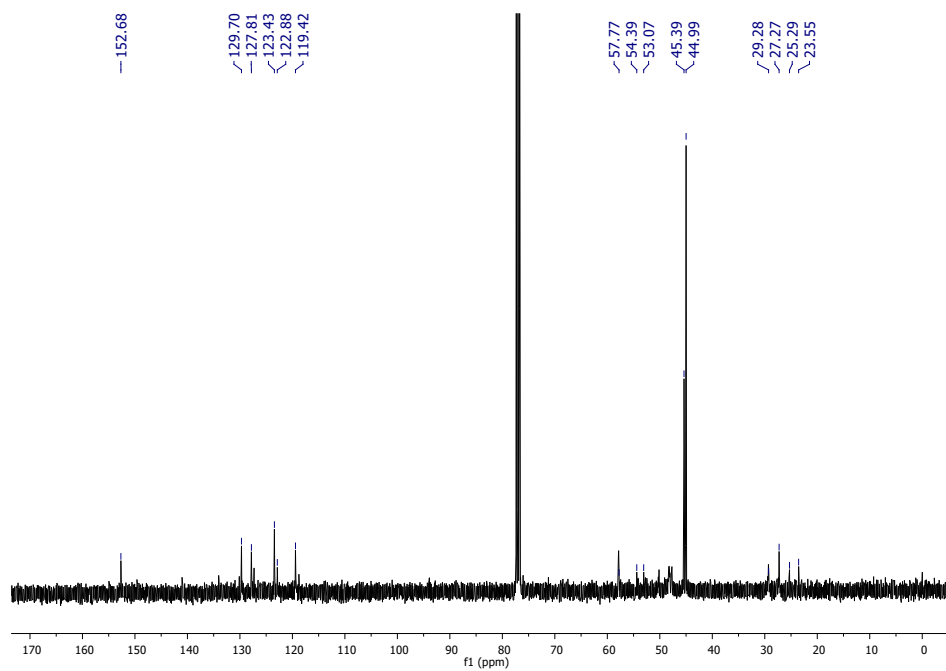

**Figure 10.**  $^{13}\text{C}$  NMR Spectrum for the Ligand **5** in  $\text{CDCl}_3$ .

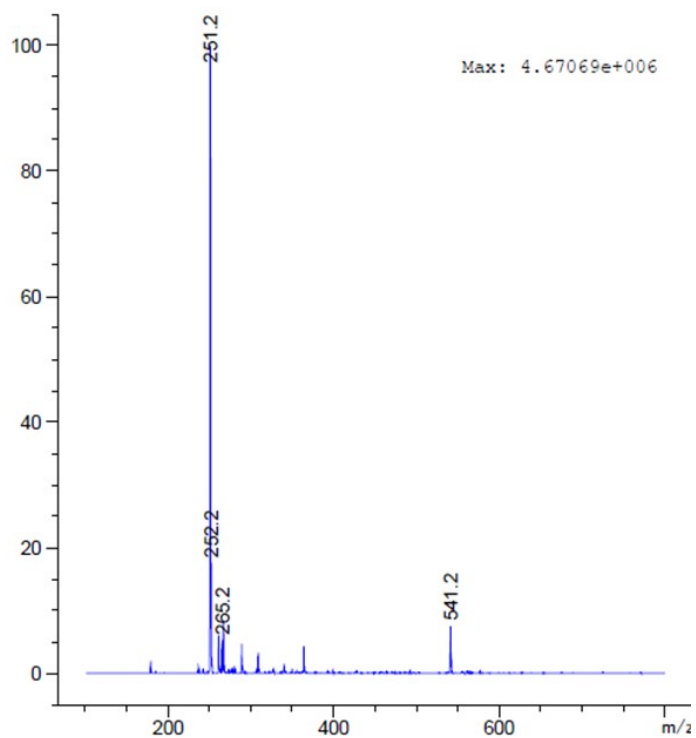

**Figure 11.** ESI-mass spectrum of L1 in acetonitrile.

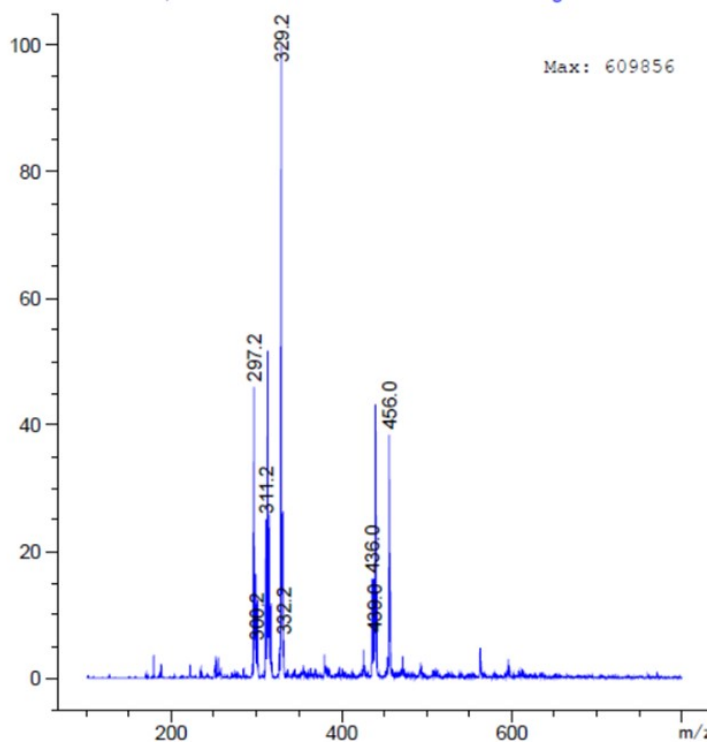

**Figure 12.** ESI-mass spectrum of L2 in acetonitrile.

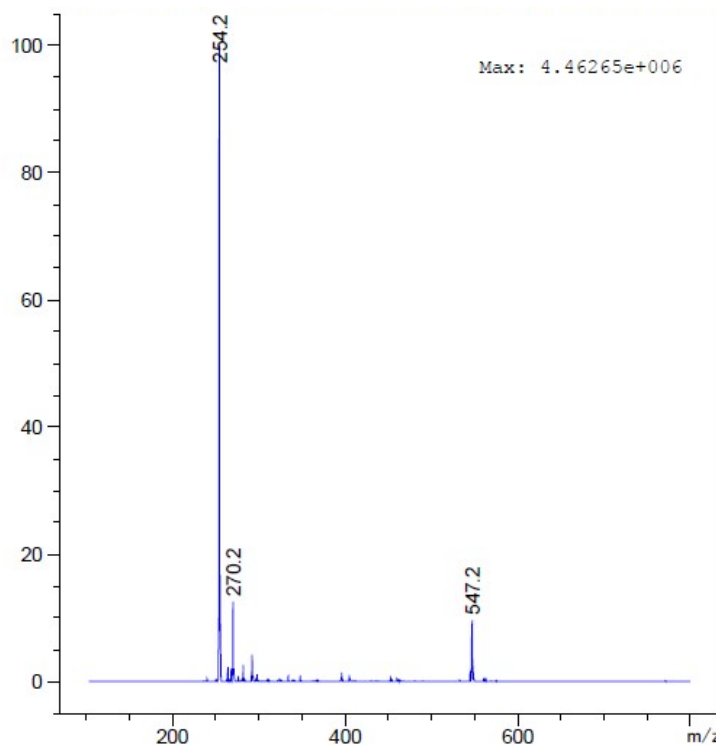

**Figure 13.** ESI-mass spectrum of L3 in acetonitrile.

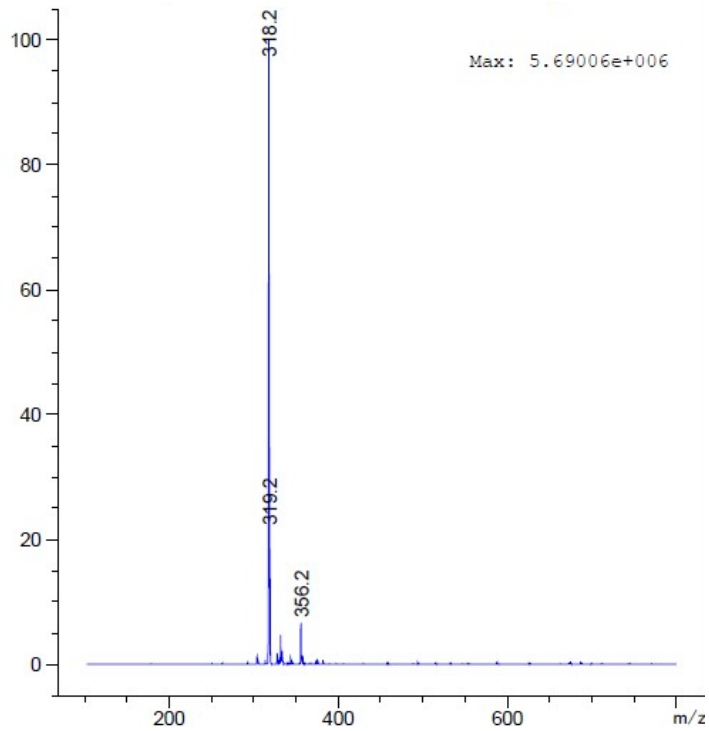

**Figure 14.** ESI-mass spectrum of L4 in acetonitrile.

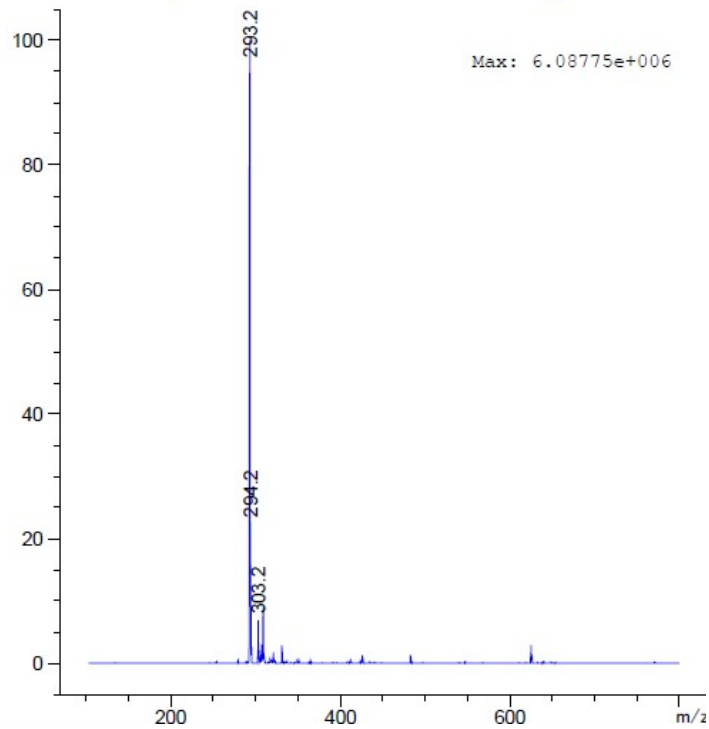

Figure 15. ESI-mass spectrum of L5 in acetonitrile.

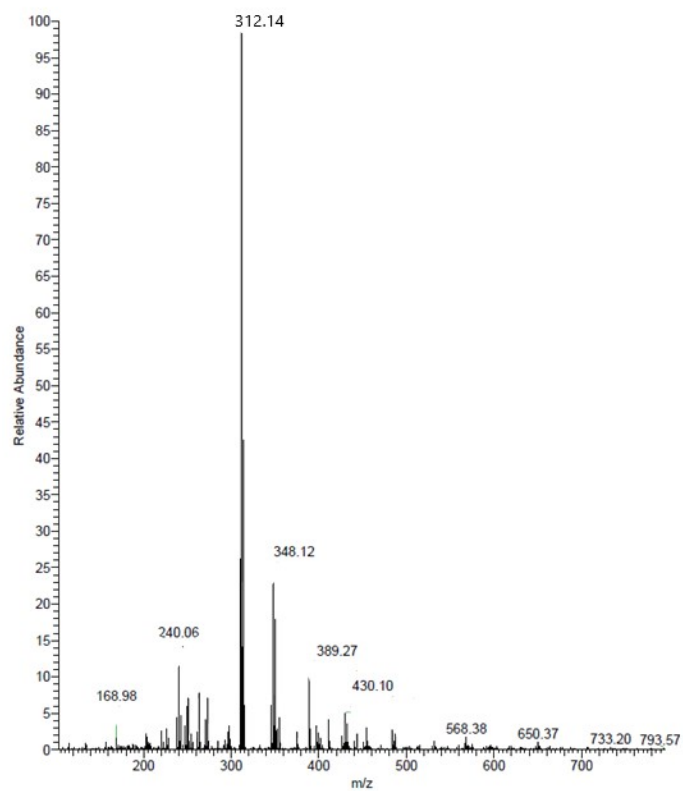

Figure 16. ESI-mass spectrum of complex 1 in acetonitrile.

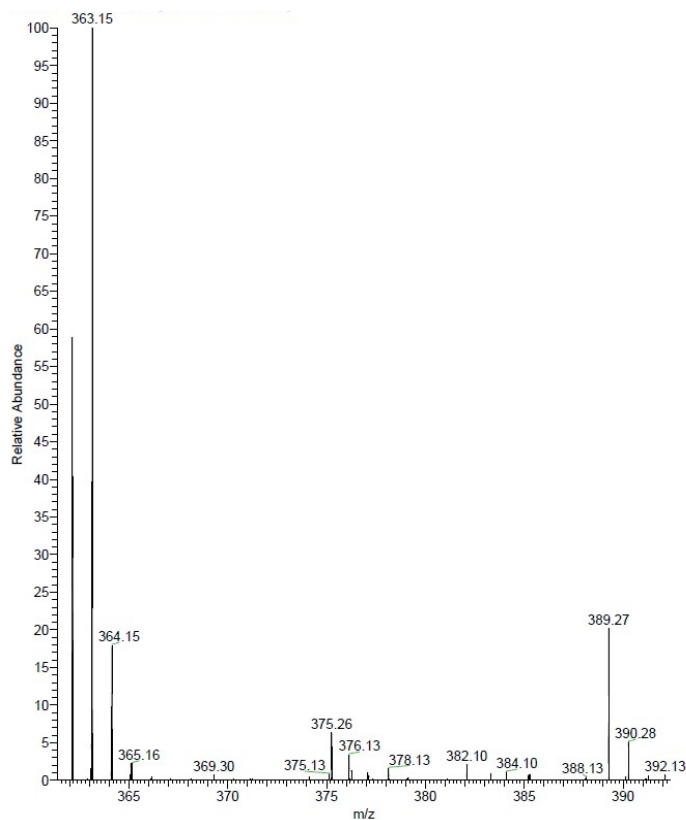

**Figure 17.** ESI-mass spectrum of complex **2** in acetonitrile.

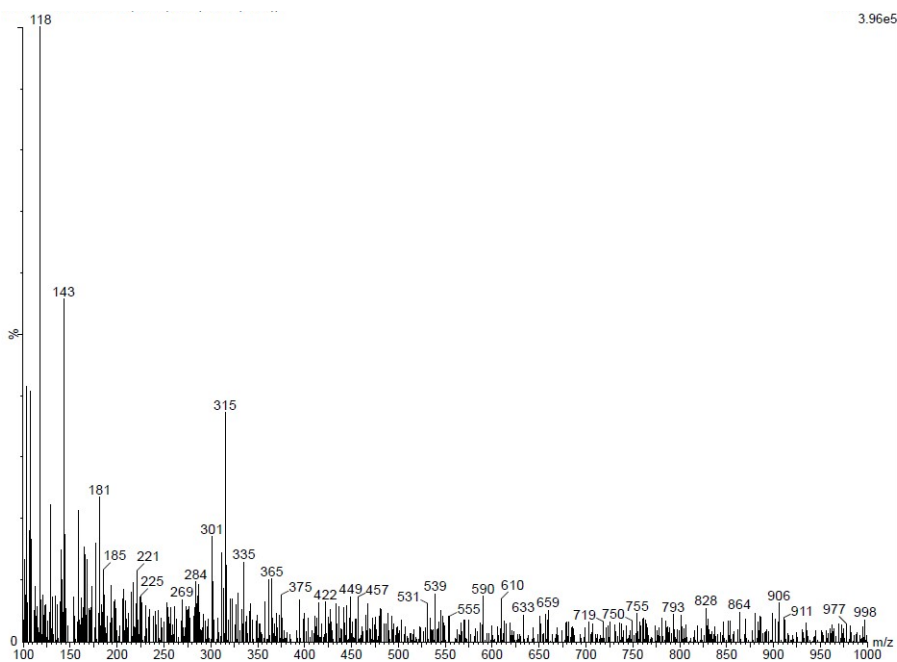

**Figure 18.** ESI-mass spectrum of complex **3** in acetonitrile.

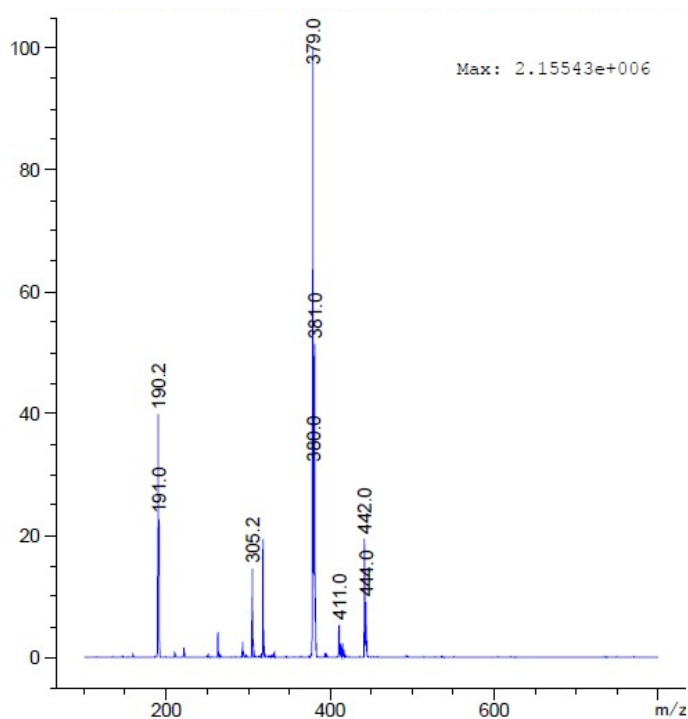

**Figure 19.** ESI-mass spectrum of complex **4** in acetonitrile.

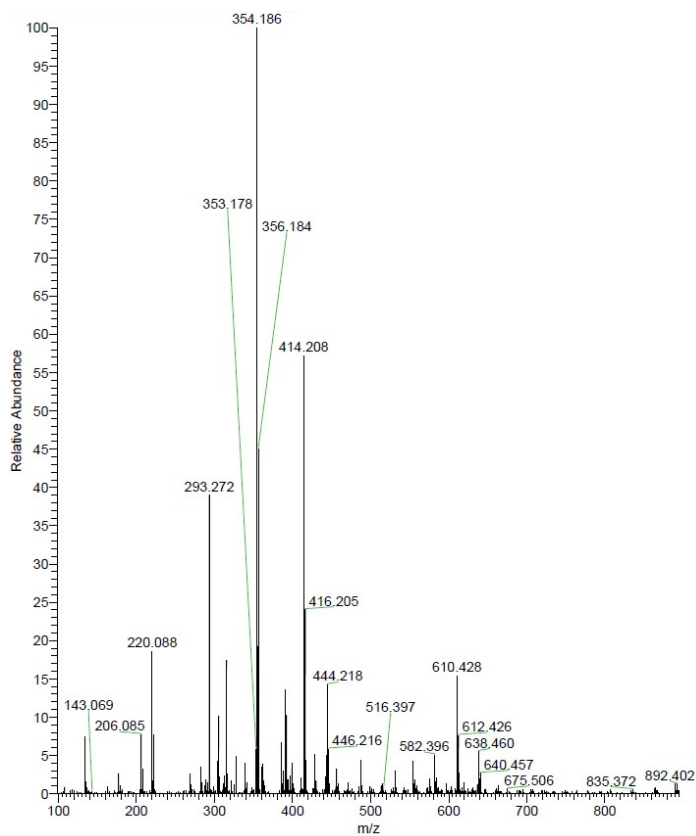

**Figure 20.** ESI-mass spectrum of complex **5** in acetonitrile.

### EPR Spectral analysis:

EPR spectra of complexes **1 – 5** were measured in methanol:DMF mixture (8:2) at 70 K. The EPR parameters  $g_{\parallel}$ ,  $g_{\perp}$ ,  $A_{\parallel}$ ,  $A_{\perp}$ , and the energies of d-d transition were used to determine the bonding parameters  $\alpha^2$ ,  $\beta^2$ , and  $\gamma^2$  which may be regarded as measures of the covalency of the in-plane  $\sigma$  bonds, and out-of-plane  $\pi$  bonds, respectively. The value of in plane sigma bonding parameter  $\alpha^2$  was estimated from the following equation (1):

$$\alpha^2 = A_{\parallel}/0.036 + (g_{\parallel} - 2.0023) + 3/7 (g_{\perp} - 2.0023) + 0.04. \dots\dots\dots (1)$$

The orbital reduction factors  $K_{\parallel} = \alpha^2\beta^2$  and  $K_{\perp} = \alpha^2\gamma^2$  were calculated using the following equations (2) and (3):

$$K_{\parallel}^2 = (g_{\parallel} - 2.0023) \Delta E (d_{xy} - d_{x^2-y^2}) / 8\lambda_0 \dots\dots\dots (2)$$

$$K_{\perp}^2 = (g_{\perp} - 2.0023) \Delta E (d_{xz,yz} - d_{x^2-y^2}) / 2\lambda_0 \dots\dots\dots (3)$$

$$K_{\parallel} = \alpha^2\beta^2 \dots\dots\dots (4)$$

$$K_{\perp} = \alpha^2\gamma^2 \dots\dots\dots (5)$$

$$\beta^2 = K_{\parallel}/\alpha^2 \dots\dots\dots (6)$$

Where,  $\lambda_0$  is the spin orbit coupling constant and has the value  $-828 \text{ cm}^{-1}$  for a copper(II)  $d^9$  system.<sup>1-2</sup>

Where,  $K_{\parallel} = K_{\perp} = 0.77$  for pure  $\sigma$  bonding and  $K_{\parallel} < K_{\perp}$  for in-plane  $\pi$  -bonding, while for the out-of-plane  $\pi$  bonding  $K_{\parallel} > K_{\perp}$ .<sup>1-2</sup> In all the copper(II) complexes, it is observed that  $K_{\parallel} < K_{\perp}$  which indicates the presence of significant in-plane  $\pi$  bonding. Furthermore,  $\alpha^2$ ,  $\beta^2$  and  $\gamma^2$  have values less than 1 which is expected for 100% ionic character of the bonds and become smaller with increasing covalent bonding. The evaluated values of  $\alpha^2$ ,  $\beta^2$  and  $\gamma^2$  of the complexes are consistent with both strong in plane  $\sigma$  and in plane  $\pi$  bonding.

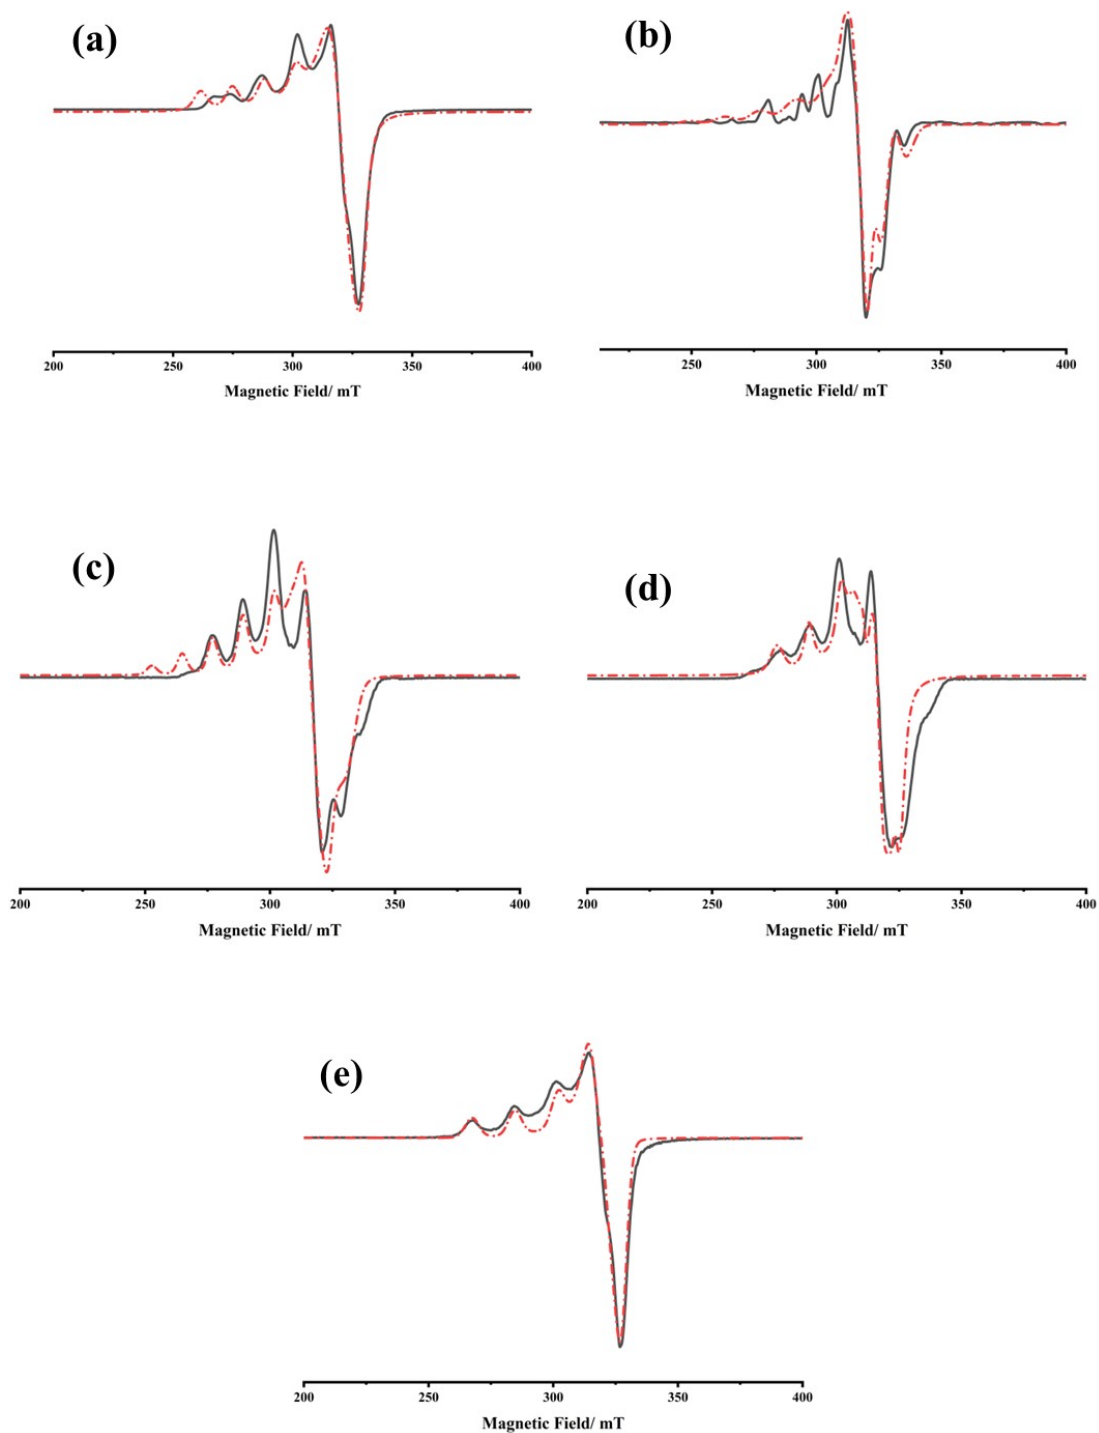

**Figure 21.** EPR spectra of **1** (a), **2** (b), **3** (c), **4** (d), and **5** (e) in methanol/DMF. Experimental (black) and simulated spectra, using EasySpin package (red), are overlaid in each case.

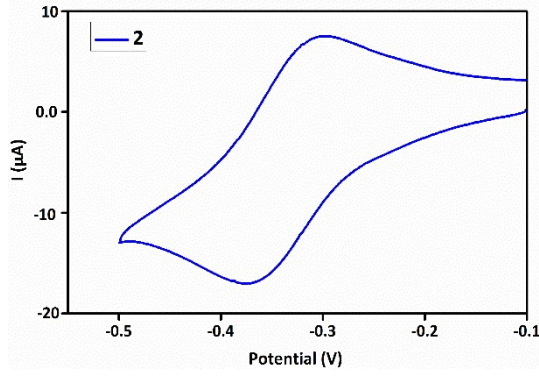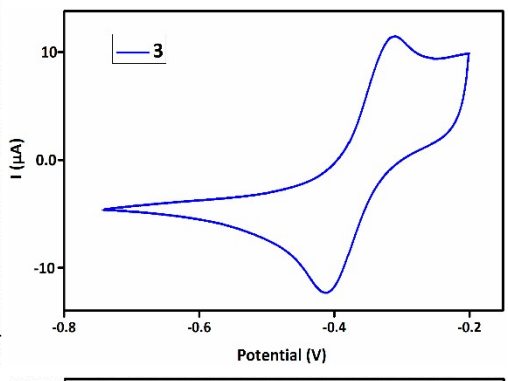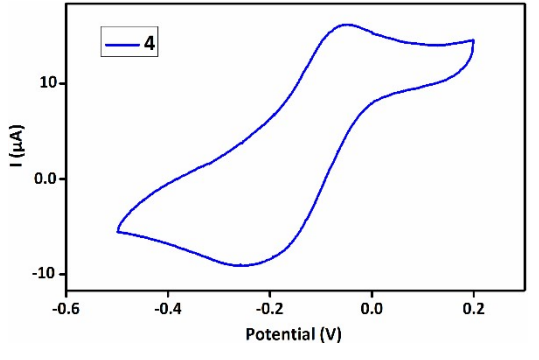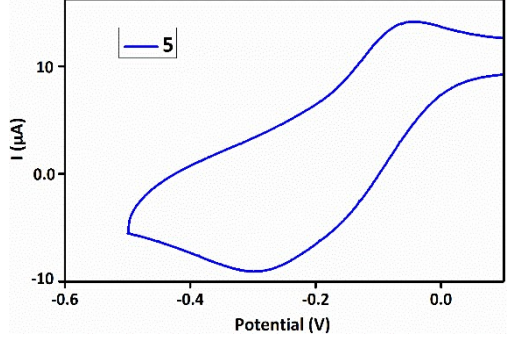

**Figure S22.** Cyclic voltammograms of complexes **2** - **5** ( $1 \times 10^{-3}$  M) in  $\text{CH}_3\text{CN}$  at  $25^\circ\text{C}$ . Supporting electrolyte:  $0.1\text{ M NaCl}$ . Working electrode: Glassy carbon, Reference electrode:  $\text{Ag}/\text{Ag}^+$  and counter electrode: Pt wire. Scan rate:  $50\text{ mV s}^{-1}$ .

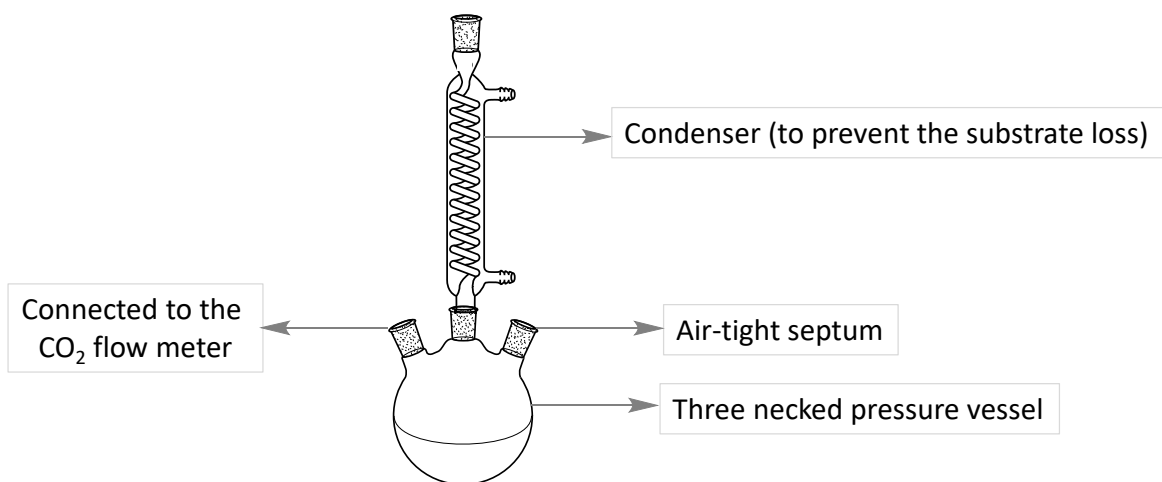

**Figure S23.** Picture of the experimental setup used in the  $\text{CO}_2$  fixation reaction.

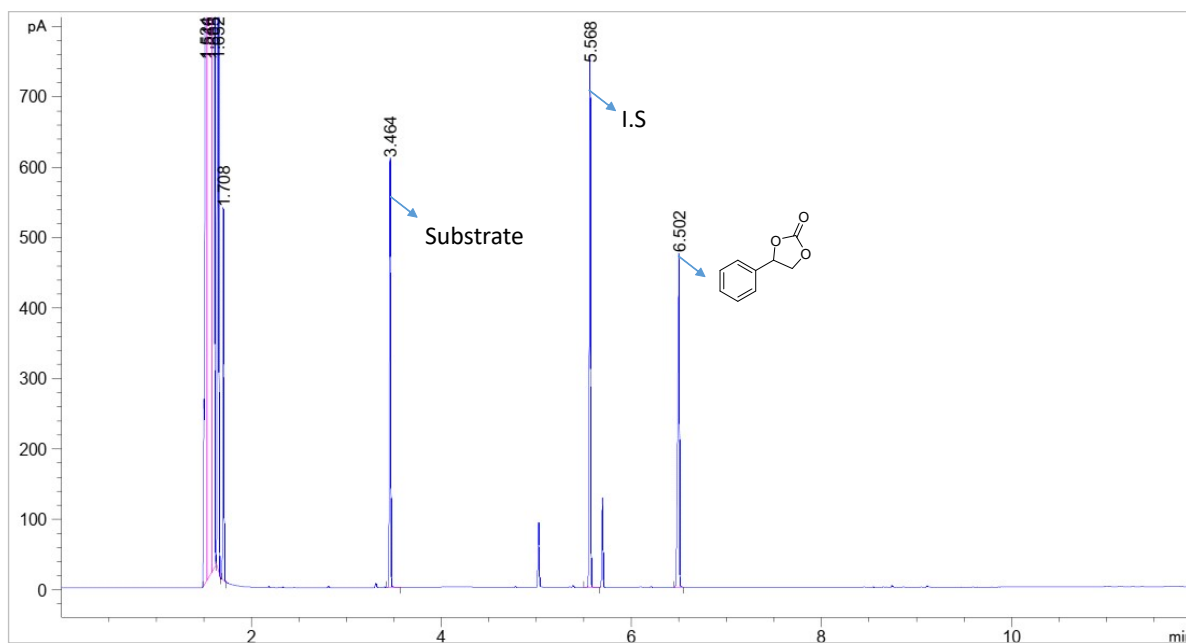

**Figure S24.** GC-Profile for the reaction of **1** with styrene oxide. Reaction condition: **1** ( $5\ \mu\text{mol}$ ,  $0.05\ \text{mol}\%$ ), substrate ( $10\ \text{mmol}$ ),  $\text{Bu}_4\text{NBr}$  ( $0.5\ \text{mol}\%$ ) under  $1\ \text{atm}\ \text{CO}_2$  for 24 hours at  $25\ ^\circ\text{C}$ .

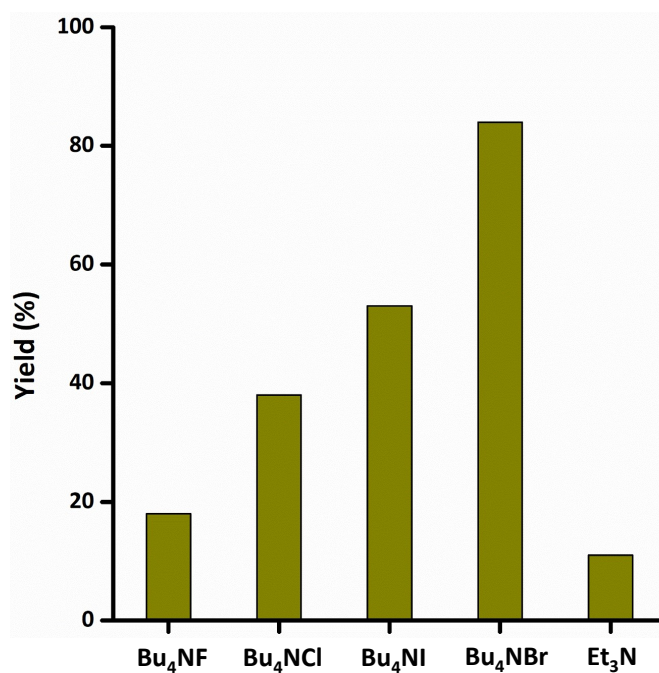

**Figure S25.** Influence of the co-catalyst in the formation of cyclic carbonate catalyzed by **1** ( $5\ \mu\text{mol}$ ,  $0.05\ \text{mol}\%$ ), epoxide ( $10\ \text{mmol}$ ), co-catalyst ( $0.5\ \text{mol}\%$ ) under  $1\ \text{atmospheric}\ \text{CO}_2$  at  $25\ ^\circ\text{C}$  for 24 hours.

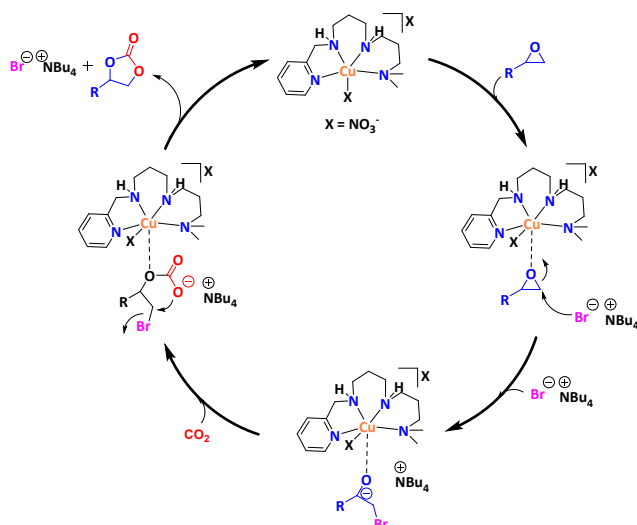

**Scheme S1.** The proposed mechanism for the fixation of CO<sub>2</sub> into cyclic carbonate by **1**.

**Table S1.** Crystallographic data and structure refinement parameters for **1**, **3** and **4**.

|                              | <b>1</b>                                                        | <b>3</b>                                                        | <b>4</b>                                                        |
|------------------------------|-----------------------------------------------------------------|-----------------------------------------------------------------|-----------------------------------------------------------------|
| Formula                      | C <sub>14</sub> H <sub>26</sub> CuN <sub>6</sub> O <sub>6</sub> | C <sub>13</sub> H <sub>27</sub> CuN <sub>7</sub> O <sub>6</sub> | C <sub>18</sub> H <sub>31</sub> CuN <sub>7</sub> O <sub>6</sub> |
| Molecular weight             | 437.95                                                          | 440.95                                                          | 505.03                                                          |
| crystal system               | Trigonal                                                        | Monoclinic                                                      | Triclinic                                                       |
| space group                  | R3c:H                                                           | P21/c                                                           | P-1                                                             |
| <i>a</i> (Å)                 | 26.520(2)                                                       | 8.2096(11)                                                      | 8.509(8)                                                        |
| <i>b</i> (Å)                 | 26.520(2)                                                       | 21.884(2)                                                       | 11.488(10)                                                      |
| <i>c</i> (Å)                 | 14.3074(11)                                                     | 11.7702(15)                                                     | 23.43(2)                                                        |
| <i>α</i> (deg)               | 90                                                              | 90                                                              | 90                                                              |
| <i>β</i> (deg)               | 90                                                              | 105.516(13)                                                     | 90                                                              |
| <i>γ</i> (deg)               | 120                                                             | 90                                                              | 102.23(3)                                                       |
| <i>V</i> (Å <sup>3</sup> )   | 8714.5(16)                                                      | 2037.5(5)                                                       | 2238(3)                                                         |
| <i>Z</i>                     | 18                                                              | 4                                                               | 2                                                               |
| <i>μ</i> (mm <sup>-1</sup> ) | 1.171                                                           | 1.115                                                           | 1.026                                                           |
| R factor all                 | 0.0560                                                          | 0.1013                                                          | 0.3213                                                          |
| R factor gt                  | 0.0453                                                          | 0.0599                                                          | 0.0992                                                          |
| wR factor ref                | 0.1292                                                          | 0.1371                                                          | 0.3055                                                          |

|                     |                  |                  |                   |                  |
|---------------------|------------------|------------------|-------------------|------------------|
| wR factor gt        | 0.1191           |                  | 0.1193            | 0.2047           |
| Goodness of fit ref | 1.080            |                  | 1.087             | 0.885            |
| Complex             | $E_{p_a}$<br>(V) | $E_{p_c}$<br>(V) | $\Delta E_p$ (mV) | $E_{1/2}$<br>(V) |
| <b>1</b>            | -0.304           | -0.376           | 72                | -0.340           |
| <b>2</b>            | -0.298           | -0.361           | 63                | -0.329           |
| <b>3</b>            | -0.317           | -0.419           | 102               | -0.368           |
| <b>4</b>            | -0.054           | -0.237           | 183               | -0.145           |
| <b>5</b>            | -0.061           | -0.297           | 236               | -0.179           |
| R1 <sup>a</sup>     | 0.0453           |                  | 0.0599            | 0.0893           |
| wR2 <sup>b</sup>    | 0.1292           |                  | 0.1371            | 0.2416           |

<sup>a</sup>R1 =  $\frac{\sum | |F_o| - |F_c| |}{\sum |F_o|}$ , <sup>b</sup>R2 =  $\frac{\sum w[(F_o - F_c)^2]}{\sum w[(F_o)^2]}^{1/2}$ .

**Table S2.** Redox data for **1 - 5** in water

<sup>a</sup>Concentration:  $1 \times 10^{-3}$  M in aqueous solution 25 °C (reference: Ag/Ag<sup>+</sup>; supporting electrolyte: 0.1 M NaCl; scan rate = 50 mV s<sup>-1</sup>).

**Table S3.** Optimization of the reaction of epichlorohydrin with 1 atm CO<sub>2</sub> using **1**

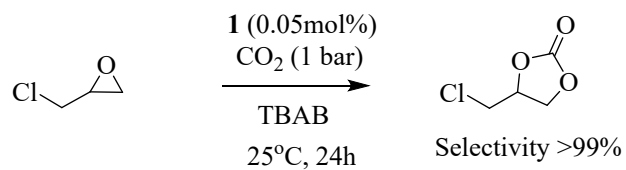

| Entry <sup>a</sup> | <b>1</b> (mol%) | Co-cat<br>(mol%) | [Y] <sup>b</sup><br>(%) | TON  | TOF<br>(h <sup>-1</sup> ) | [S]<br>(%) |
|--------------------|-----------------|------------------|-------------------------|------|---------------------------|------------|
| 1                  | 0.025           | 0.25             | 29                      | 580  | 24                        | >99        |
| 2                  | 0.025           | 0.50             | 57                      | 1140 | 47                        | >99        |
| 3                  | 0.05            | 0.50             | 84                      | 1680 | 70                        | >99        |
| 4                  | 0.05            | -                | 5                       | 100  | 4                         | -          |
| 5                  | -               | 0.50             | 9                       | 180  | 7                         | >99        |
| 6 <sup>c</sup>     | 0.05            | 0.50             | 18                      | 360  | 15                        | >99        |
| 7 <sup>d</sup>     | 0.05            | 0.50             | 38                      | 760  | 31                        | >99        |
| 8 <sup>e</sup>     | 0.05            | 0.50             | 53                      | 1060 | 44                        | >99        |
| 9 <sup>f</sup>     | 0.05            | 0.50             | 11                      | 220  | 9                         | >99        |
| 10 <sup>g</sup>    | 0.05            | 0.50             | 8                       | 160  | 6                         | -          |
| 11 <sup>h</sup>    | 0.05            | 0.50             | 5                       | 100  | 4                         | -          |

<sup>a</sup>General reaction condition: **1** (5  $\mu$ mol, 0.05 mol%), epichlorohydrin (10 mmol), Bu<sub>4</sub>NBr(0.5 mol%) under 1 atmospheric CO<sub>2</sub> for 24 hours at 25 °C. <sup>b</sup>GC Yield (average of three runs). <sup>c</sup>Using TBAF. <sup>d</sup>Using TBAC. <sup>e</sup>Using TBAI. <sup>f</sup>Using Et<sub>3</sub>N. <sup>g</sup>Using Copper(II)acetate. <sup>h</sup>Using Copper(II)chloride.

**Table S4.** Comparison of the catalysts **1 – 5**

| Complex | [Substrate]/[Cu] | Co-cat<br>(mol%) | [Y] <sup>b</sup><br>(%) | TON | TOF<br>(h <sup>-1</sup> ) | [S]<br>(%) |
|---------|------------------|------------------|-------------------------|-----|---------------------------|------------|
|---------|------------------|------------------|-------------------------|-----|---------------------------|------------|

|          |      |      |    |      |    |     |
|----------|------|------|----|------|----|-----|
| <b>1</b> | 2000 | 0.50 | 84 | 1680 | 70 | >99 |
| <b>2</b> | 2000 | 0.50 | 67 | 1340 | 56 | >99 |
| <b>3</b> | 2000 | 0.50 | 75 | 1500 | 62 | >99 |
| <b>4</b> | 2000 | 0.50 | 72 | 1440 | 60 | >99 |
| <b>5</b> | 2000 | 0.50 | 56 | 1120 | 47 | >99 |

<sup>a</sup>General reaction condition: catalyst (5  $\mu$ mol, 0.05 mol%), epichlorohydrin (10 mmol), Bu<sub>4</sub>NBr (0.5 mol%) under 1 atmospheric CO<sub>2</sub> for 24 hours at 25 °C. <sup>b</sup>GC Yield (average of three runs).

## References

- (1) (a) E. Garribba, G. Micera, *J. Chem. Educ.*, 2006, **83**, 1229; (b) S. H. Laurie, T. Lund, J. B. Raynor, *J. Chem. Soc., Dalton Trans.*, 1975, 1389-1394.
- (2) (a) E. I. Solomon, *Inorg. Chem.*, 2006, **45**, 8012. (b) P. F. Rapheal, E. Manoj, M. R. P. Kurup, *Polyhedron* 2007, **26**, 818.
